# Supplementary material for: Two novel fish paralogs provide insights into the Rid family of imine deaminases active in pre-empting enamine/imine metabolic damage
Source: Springer Nature journal article supplement (doi:10.1038/s41598-020-66663-w), 2020-06-23
Supplement: MOESM1 [file 41598_2020_66663_MOESM1_ESM.pdf]

## Supplementary information

### Two novel fish paralogs provide insights into the Rid family of imine deaminases active in pre-empting enamine/imine metabolic damage

Stefania Digiovanni<sup>1,#</sup>, Cristina Visentin<sup>1</sup>, Genny Degani<sup>1</sup>, Alberto Barbiroli<sup>2</sup>, Matteo Chiara<sup>1</sup>, Luca Regazzoni<sup>3</sup>, Flavio Di Pisa<sup>1</sup>, Andrew J. Borchert<sup>4,‡</sup>, Diana M. Downs<sup>4</sup>, Stefano Ricagno<sup>1</sup>, Maria Antonietta Vanoni<sup>1,§</sup> and Laura Popolo<sup>1,\*</sup>

<sup>1</sup>Department of Biosciences, <sup>2</sup> Department of Food, Environmental and Nutritional Sciences and <sup>3</sup> Department of Pharmaceutical Sciences, University of Milan, Italy; <sup>4</sup>Department of Microbiology, University of Georgia, Athens, GA

§Co-corresponding author

\*Corresponding author

**Figure S1**

**Table S1**

**Figure S2**

**Table S2**

**Figure S3**

**Table S3**

**Figure S4**

**Table S4**

**Table S5**

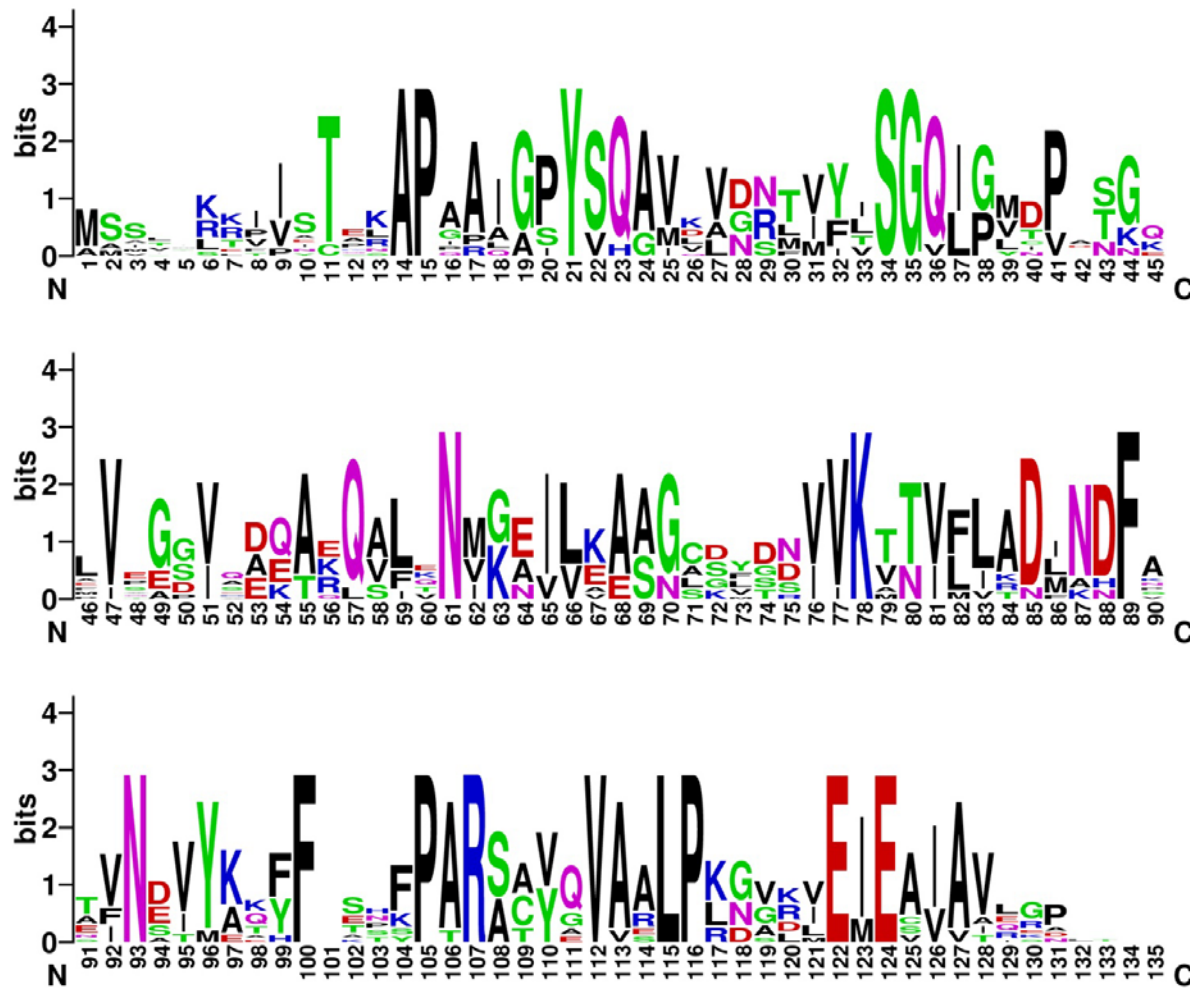

**Figure S1**

WebLogo of the RidA sequences of the multiple alignment shown in **Fig. 2**. Amino acids are color coded according to the WebLogo standard settings as follows: G, S, T, Y, C, Q, N are green, K, R, H are blue, D, E red and A, V, L, I, P, W, F, M are black. To align the essential Arg105 of prokaryotes with the essential Arg107 of eukaryotes, three not conserved amino acids at position104-106 (HQA in *E. coli* and HNA in *S. typhimurium*) were removed to generate the WebLogo, which requires sequences of identical length. The numbering is that of eukaryotic RidA.

**Table S1.** Bacterial strains and plasmids

|                      | Genotype                                                                     | Plasmid | Notes                              | Source    |
|----------------------|------------------------------------------------------------------------------|---------|------------------------------------|-----------|
| <i>E. coli</i>       |                                                                              |         |                                    | Lab stock |
| <i>Rosetta (DE3)</i> |                                                                              |         |                                    |           |
| SD1                  | pRARE (Cm <sup>R</sup> )<br>pET15b- <sub>ss</sub> RidA-1 (Amp <sup>R</sup> ) | pSD1    | Production of <sub>ss</sub> RidA-1 | This work |
| SD2                  | pRARE (Cm <sup>R</sup> )<br>pET15b- <sub>ss</sub> RidA-2 (Amp <sup>R</sup> ) | pSD2    | Production of <sub>ss</sub> RidA-2 | This work |
| GD1                  | pRARE (Cm <sup>R</sup> )<br>pET15b- <sub>ch</sub> RidA-2 (Amp <sup>R</sup> ) | pGD1    | Production of <sub>ch</sub> RidA   | (25)      |
| <i>S. enterica</i>   |                                                                              |         |                                    |           |
| DM14829              | <i>ridA1::Tn10d</i> (Tc)                                                     | None    |                                    | Lab stock |
| DM16362              | <i>ridA1::Tn10d</i> (Tc)                                                     | pCV1    | <i>BspQI</i> -modified pBAD24      | (47)      |
| DM16360              | <i>ridA1::Tn10d</i> (Tc)                                                     | pDM1439 | pCV1- <i>ridA</i>                  | (23)      |
| DM16978              | <i>ridA1::Tn10d</i> (Tc)                                                     | pDM1616 | pCV1- <sub>ss</sub> RidA-1         | This work |
| DM16979              | <i>ridA1::Tn10d</i> (Tc)                                                     | pDM1617 | pCV1- <sub>ss</sub> RidA-2         | This work |

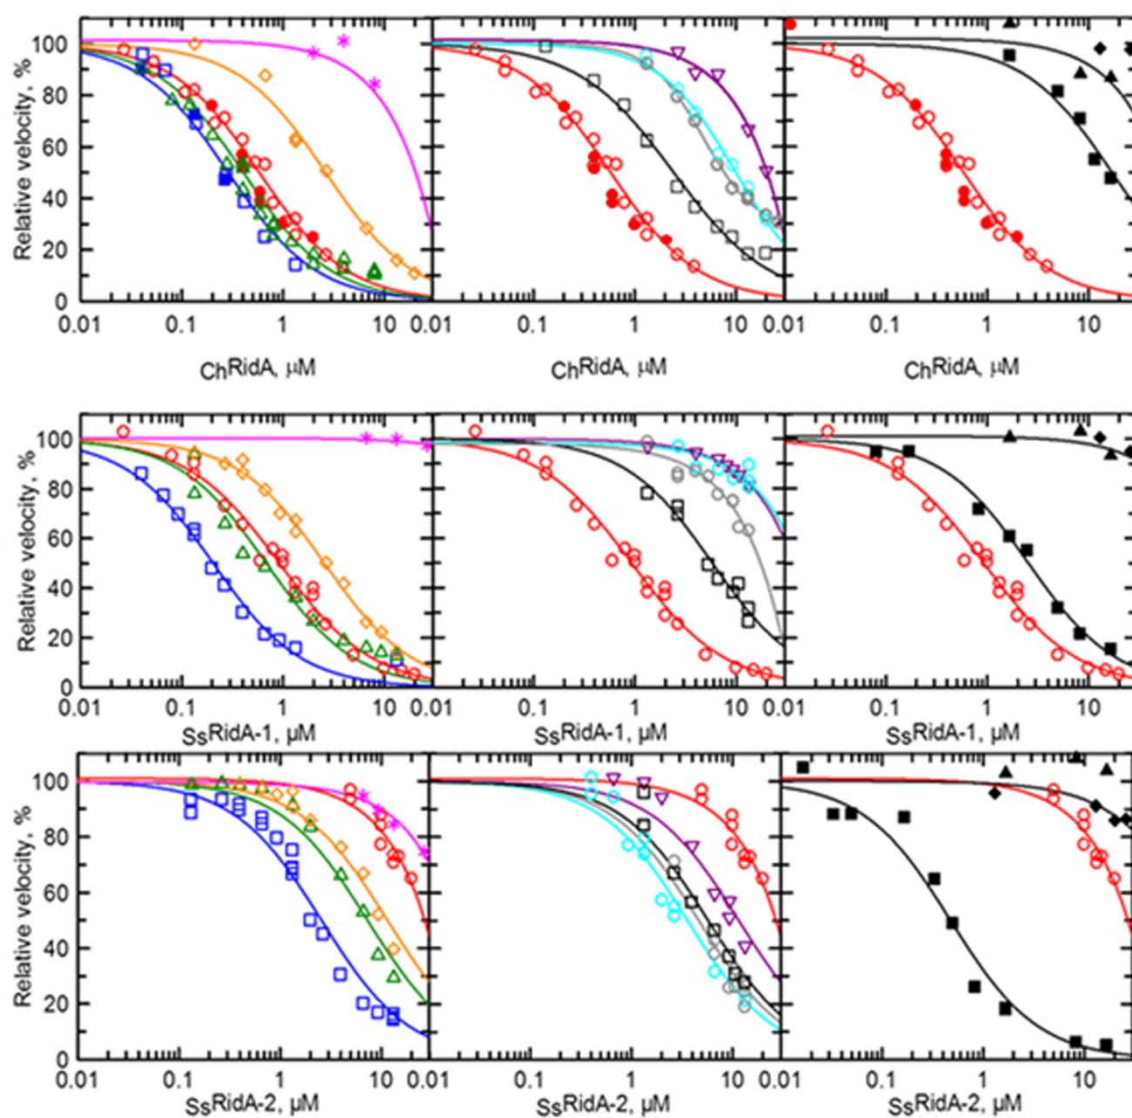

**Figure S2.** Specificity of  $_{Ch}RidA$ ,  $_{Ss}RidA-1$  and  $_{Ss}RidA-2$ . *Left panels:* L-Ala (open squares, blue), L-Leu (open circles, red), L-Met (open triangles, green), L-Gln (open diamonds, orange), L-His (stars, fuchsia). *Middle panels:* L-Leu (open circles, red), L-Phe (inverted triangles, purple), L-Tyr (open hexagons, light blue), L-Trp (open squares, black), L-DOPA (open circles, grey). *Right panels:* L-Leu (open circles, red), L-Glu (closed squares, black), L-Asp (closed diamonds, black). L-Leu is reported in all panels as an internal reference. For the  $_{Ch}RidA$ , D-Leu (closed circles, red), which was reported in the previous study in which also D-amino acid oxidase was used (25), is also shown as an internal reference. The experimental points represent the initial velocity of semicarbazone production measured in the presence of RidA ( $v_{RidA}$  expressed as percent of that measured in the absence of RidA ( $v_0$ ), i.e.  $[v_{RidA}/v_0 \times 100]$ ). The amount of L-amino acid oxidases used to generate the imino acid substrate of RidA from different amino acids was adjusted in order to obtain similar  $v_0$  values in the range 0.2-03  $\Delta A_{248}/min$ . Data were fitted to Equation 1, obtaining the values of the concentration of RidA proteins that halves the velocity of semicarbazone formation ( $K_{50}$ ), from which the  $100/K_{50}$  values summarized in Table S2 were obtained. The data obtained with L-Phe were fitted with a straight line. In this case  $100/K_{50}$  is the absolute value of the slope of the line.

**Table S2. Specificity of salmon RidA proteins compared to goat RidA**

| Amino acid <sup>a</sup> | 100/K <sub>50</sub> <sup>a</sup> , $\mu\text{M}^{-1}$ |                      |                        |
|-------------------------|-------------------------------------------------------|----------------------|------------------------|
|                         | ChRidA                                                | ssRidA-1             | ssRidA-2               |
| L-Leu                   | 172.0±9.4                                             | 112 ± 9              | 1.90±0.15 <sup>b</sup> |
| L-Ala                   | 348±24                                                | 489±23               | 38.9±2.2               |
| L-Met                   | 245±16                                                | 146±14               | 13.6±1.1               |
| L-Gln                   | 37.9±2.7                                              | 39.0±1.3             | 8.7±0.6                |
| L-His                   | 1.9±1 <sup>b</sup>                                    | NA                   | 0.98±0.1 <sup>c</sup>  |
| L-Tyr                   | 9.6±0.6                                               | 1.2±0.2 <sup>b</sup> | 27.7±2.2               |
| L-Phe                   | 2.50±0.16 <sup>b</sup>                                | 1.4±0.2 <sup>b</sup> | 8.7±0.9                |
| L-DOPA                  | 10.6±0.5                                              | 2.8±0.3 <sup>b</sup> | 21.6±1.2               |
| L-Trp                   | 41±2.2                                                | 17.2±0.9             | 17.4±1.5               |
| L-Arg                   | 1.0±0.5 <sup>d</sup>                                  | ND <sup>c</sup>      | ND                     |
| L-Asp                   | ND                                                    | ND                   | ND                     |
| L-Glu                   | 5.9±0.5                                               | 40.4±3.3             | 210±25                 |

<sup>a</sup>The values were obtained by fitting three or more independent measurements of reaction velocity  $v$  with Equation (1)  $\pm$  standard deviation (see “Assay of RidA imine deaminase activity” under Methods).

<sup>b</sup>The amino acid concentration was 5 mM except for L-aromatic amino acids (0.5 mM) but the amount of the L-amino acid oxidase was adjusted to obtain similar initial velocities of imino acid formation starting from the different amino acids.

<sup>c</sup>Data were fitted with a straight line in which the absolute value of the slope corresponds to 100/K<sub>50</sub>

<sup>d</sup>No detectable RidA activity up to 20  $\mu\text{M}$  RidA.

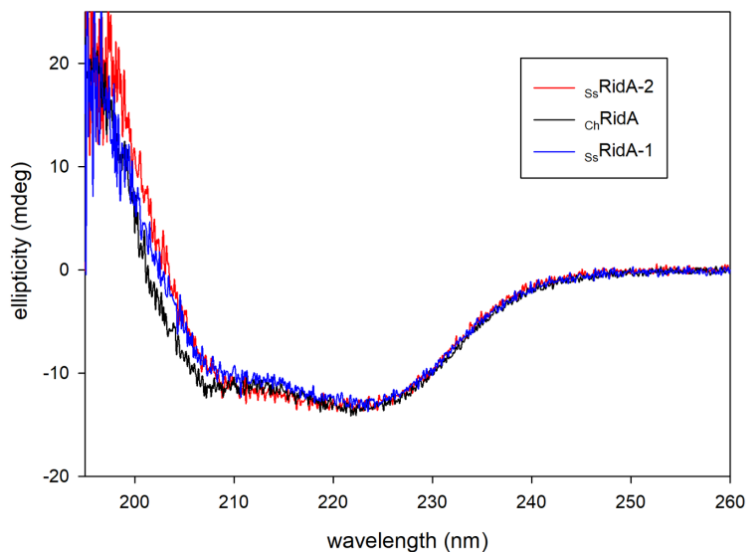

**Figure S3.** Far-UV CD spectra of the indicated proteins. Spectra were acquired at 20 °C in 0.1 cm path length cuvette, at 0.2 mg/mL protein concentration.

**Table S3. Predicted secondary structure content of salmon and goat Rid proteins**

| Predicted secondary structure content (%) |              |              |            |
|-------------------------------------------|--------------|--------------|------------|
|                                           | $s_s$ RidA-1 | $s_s$ RidA-2 | $c_h$ RidA |
| Helix                                     | 17.1         | 18.8         | 17.2       |
| Antiparallel                              | 23.2         | 22.4         | 21.9       |
| Parallel                                  | 5.8          | 6.0          | 5.6        |
| Beta-Turn                                 | 17.6         | 16.6         | 18.5       |
| Random Coil                               | 33.5         | 32.9         | 33.8       |

Estimate of the secondary structure composition was obtained by running CDNN CD deconvolution software, version 2.1 (Copyright © Gerald Böhm, Institut für Biotechnologie, Martin-Luther Universität Halle-Wittenberg) on spectra reported in **Fig. S3**, in the 200-260 nm region.

**A**

| Type      | Sequences                                                                                                                                                                                                                                                                                                                                                                                                                                               | CAI   | ENc | % GC | % AT |
|-----------|---------------------------------------------------------------------------------------------------------------------------------------------------------------------------------------------------------------------------------------------------------------------------------------------------------------------------------------------------------------------------------------------------------------------------------------------------------|-------|-----|------|------|
| Query     | ATGTCTTCGATCATCAGGAAGATAAATTAACACCAGTAAAGCGCCAGCAGCTATCGGGCCG<br>TACAGCCAGGCGGTGGTGGTGGACAGGACCATGTACGTGTCAGGCCAGCTGGGGATGGAC<br>CCTGCCCTCTGGTCAGCTGGTGGAAAGGAGGAGTCCAGGCTCAGACCAAACAGGCTCTGGTG<br>AACATGGGGGAGATCCTGAAAGAAGCAGGGTGTGGATATGACAGTGTCTGAAAACCTACG<br>GTTCTTTTGGCTGACATGAATGACTTCGCCAGTGTAAATGACGTCTATAAAACATTTTTTC<br>AGCAGTAGCTTCCCAGCGAGGGCTGCCACCAGGTGCGTCTGCTGCCCCAGGGGTGGGCTT<br>GTAGAGATTGAAGCTGTGGCTGTTCTAGGCCCTCTGACTGAGGTCTCTTGA | 0.404 | 47  | 53.8 | 46.2 |
| Optimized | ATGTCCATCCATCCGTAATAATCATCAACACCTCCAAAGCGCCGGCGGCATCGGGCCG<br>TACTCCCAGGCGGTGGTGGTGGACCGTACCATGTACGTGTCCGGCCAGCTGGGCATGGAC<br>CCGGCTCCGGCCAGCTGGTGGAAAGCGGGTGCAGGCCAGACCAAACAGGCGCTGGTG<br>AACATGGGGGAAATCCTGAAAGAAGCGGGCTGCGGCTACGACTCCGTGGTGAAAACACC<br>GTGCTGCTGGCGGACATGAACGACTTCGCGTCCGTGAACGACGTGTACAAAACCTTCTTC<br>TCTCCTCCTTCCCAGCGCGTGCAGGTGCGGCGTACCAGGTGGCGGCGTGCAGCGTGGCGGCTG<br>GTGGAAATCGAAGCGGTGGCGGTGCTGGGCCGCTGACCGAAGTGTCTTGA         | 1.000 | 20  | 64.5 | 35.5 |

**B**

| Type      | Sequences                                                                                                                                                                                                                                                                                                                                                                                                                                        | CAI   | ENc | % GC | % AT |
|-----------|--------------------------------------------------------------------------------------------------------------------------------------------------------------------------------------------------------------------------------------------------------------------------------------------------------------------------------------------------------------------------------------------------------------------------------------------------|-------|-----|------|------|
| Query     | ATGGCTGCTGTTTTCAGAACTCTTTCCTTATACTCCTAGAGCACCTATAAGGCAGGGGATT<br>TACAGCCAGGCGGTGGTGGTGGATCGGACGATGTACATCTCCGGCCAGCTGGGGCTGGAC<br>GTGGCTCAGGGAAGCTGGTGGAGGGAGGGGTACAGGCTCAGGCCAGACAGGCTCTGGTC<br>AATATGGGAGAGATCCTGAAAGCAGCTGGATGTGGTTATGACAATGTCGTCAAGACAACC<br>GTGCTGTTGGCAGACATGAATGACTTTGTCAATGTCAACGATGTTTATAAGACATTTTTTC<br>AGCAAAAACCTTCCCTGCCAGAGCTGCCACCAGGTTGTTGCCCTCCCAGAGGTGGCCTG<br>GTGGAGATCGAGGCTGTGGCTGTTCTGGGACCCATCTCTGAGTCTTGA | 0.379 | 47  | 53.7 | 46.3 |
| Optimized | ATGGCGCGGTGCAGAAACTGTTCCCGTACACCCCGCGTGCAGCGATCCGTCAGGGCATC<br>TACTCCCAGGCGGTGGTGGTGGACCGTACCATGTACATCTCCGGCCAGCTGGGCCTGGAC<br>GTGGCTCCGGCAAACCTGGTGGAAAGCGGGTGCAGGCCAGGCGCTCAGGCGCTGGTG<br>AACATGGGCGAAATCCTGAAAGCGGGCTGCGGCTACGACAACGTGGTGAAAACACC<br>GTGCTGCTGGCGGACATGAACGACTTCGTGAACGTGAACGACGTGTACAAAACCTTCTTC<br>TCCAAAACCTTCCCAGCGCGTGCAGGTGCGGCGTACCAGGTGGTGGCGTGCAGCGTGGCGGCTG<br>GTGGAAATCGAAGCGGTGGCGGTGCTGGGCCGATCTCCGAATCCTGA      | 1.000 | 20  | 64.2 | 35.8 |

**Figure S4.** Codon optimized sequences used for the synthesis of (A) *ridA-1* and (B) *ridA-2* salmon gene sequences by GenScript (Piscataway, NJ), as determined using the online application OPTIMIZER (<http://genomes.urv.es/OPTIMIZER/>). The *Salmonella enterica* subsp. *enterica* serovar Typhimurium str. LT2 was denoted as the reference, the codon usage of the most highly expressed genes (HEG) was selected, and the one AA-one codon function was employed for making changes, which substitutes every amino acid codon with the most frequent codon in *S. enterica* LT2 HEG usage table. Sequence inputs and outputs are provided along with their corresponding codon adaptation index (CAI), effective number of codons (ENc) value, % GC content of the sequence, and %AT content of the sequence. CAI (0-1) measures the similarity between codon usage of the gene and reference, where 1 represents perfect correlation, and ENc (20-61) measures codon usage bias where 20 means that only 20 of the possible 61 codons were used.

**Table S4.** Data collection and refinement statistics

|                                                     | <sup>ss</sup> RidA-1<br>(PDB code 6TCC) | <sup>ss</sup> RidA-2<br>(PDB code 6TCD) |
|-----------------------------------------------------|-----------------------------------------|-----------------------------------------|
| <b>Crystal</b>                                      |                                         |                                         |
| Space group                                         | H 32                                    | P 2 <sub>1</sub> 2 <sub>1</sub> 2       |
| Cell dimensions <i>a, b, c</i> (Å)                  | 52.19, 52.19, 242.56                    | 100.89, 146.57, 53.68                   |
| <b>Data collection</b>                              |                                         |                                         |
| Beamline                                            | DLS I03                                 | DLS I04                                 |
| Wavelength (Å)                                      | 0.6500                                  | 0.9795                                  |
| Resolution (Å)                                      | 42.35-1.05 (1.11-1.05)                  | 83.10-1.36(1.47-1.36)                   |
| Total reflections                                   | 1169599 (164151)                        | 1505301 (58528)                         |
| Unique reflections                                  | 60156 (8683)                            | 114968(5748)                            |
| <i>R</i> <sub>merge</sub>                           | 0.057 (1.174)                           | 0.079 (1.435)                           |
| <i>R</i> <sub>meas</sub> ,                          | 0.059 (1.206)                           | 0.082 (1.513)                           |
| <i>I</i> / $\sigma$ ( <i>I</i> )                    | 21.1 (2.5)                              | 16.5 (1.5)                              |
| <i>CC</i> <sub>1/2</sub>                            | 1.000 (0.860)                           | 1.000 (0.628)                           |
| Completeness (%)                                    | 100.0 (100.0)                           | 95.4 (67.2)                             |
| Redundancy                                          | 19.4 (18.9)                             | 13.1 (10.2)                             |
| Wilson B-factor (Å)                                 | 11.7                                    | 15.1                                    |
| <b>Refinement</b>                                   |                                         |                                         |
| Resolution (Å)                                      | 33.07-1.05                              | 43.97-1.36                              |
| No. reflections                                     | 60133                                   | 114898                                  |
| <i>R</i> <sub>work</sub> / <i>R</i> <sub>free</sub> | 14.5/16.3                               | 15.9/18.4                               |
| No. atoms                                           |                                         |                                         |
| Protein                                             | 1982                                    | 5830                                    |
| Ligands                                             | 31                                      | 43                                      |
| Water                                               | 94                                      | 809                                     |
| <i>B</i> factors                                    |                                         |                                         |
| Protein                                             | 19.7                                    | 19.5                                    |
| Ligands                                             | 52.6                                    | 28.3                                    |
| Water                                               | 24.8                                    | 29.9                                    |
| R.m.s. deviations                                   |                                         |                                         |
| Bond lengths (Å)                                    | 0.008                                   | 0.006                                   |
| Bond angles (°)                                     | 1.061                                   | 0.800                                   |
| Clash scores                                        | 1.95                                    | 1.52                                    |
| Ramachandran                                        |                                         |                                         |
| Favored (%)                                         | 98.5                                    | 98.2                                    |
| Allowed (%)                                         | 1.5                                     | 1.8                                     |

<sup>a</sup> Values in parentheses are for highest-resolution shell.



**Table S5**

| <b>Species</b>    | <b>Genome assembly</b> | <b>Resource accessed</b> | <b>Annotation source</b> | <b>Link</b>                                                                                                                                                                                         |  |  |  |  |  |
|-------------------|------------------------|--------------------------|--------------------------|-----------------------------------------------------------------------------------------------------------------------------------------------------------------------------------------------------|--|--|--|--|--|
| <i>H. sapiens</i> | GRCh38/hg38            | UCSC gb                  | Ncbi Refseq              | <a href="https://hgdownload.soe.ucsc.edu/goldenPath/hg38/bigZips/genes/hg38.ncbiRefSeq.gtf.gz">https://hgdownload.soe.ucsc.edu/goldenPath/hg38/bigZips/genes/hg38.ncbiRefSeq.gtf.gz</a>             |  |  |  |  |  |
| <i>C. hircus</i>  | CHIR_1.0               | NCBI                     | Ncbi Refseq              | <a href="https://www.ncbi.nlm.nih.gov/genome/annotation_euk/Capra_hircus/102/">https://www.ncbi.nlm.nih.gov/genome/annotation_euk/Capra_hircus/102/</a>                                             |  |  |  |  |  |
| <i>G. gallus</i>  | galGal6                | UCSC gb                  | Ncbi Refseq              | <a href="https://hgdownload.soe.ucsc.edu/goldenPath/galGal6/bigZips/genes/galGal6.ncbiRefSeq.gtf.gz">https://hgdownload.soe.ucsc.edu/goldenPath/galGal6/bigZips/genes/galGal6.ncbiRefSeq.gtf.gz</a> |  |  |  |  |  |
| <i>X. laevis</i>  | xenLae2                | UCSC gb                  | Ncbi Refseq              | <a href="https://hgdownload.soe.ucsc.edu/goldenPath/xenLae2/bigZips/genes/xenLae2.ncbiRefSeq.gtf.gz">https://hgdownload.soe.ucsc.edu/goldenPath/xenLae2/bigZips/genes/xenLae2.ncbiRefSeq.gtf.gz</a> |  |  |  |  |  |
| <i>O. latypes</i> | oryLat2                | UCSC gb                  | Ncbi Refseq              | <a href="https://hgdownload.soe.ucsc.edu/goldenPath/oryLat2/bigZips/genes/oryLat2.refGene.gtf.gz">https://hgdownload.soe.ucsc.edu/goldenPath/oryLat2/bigZips/genes/oryLat2.refGene.gtf.gz</a>       |  |  |  |  |  |
| <i>G. mohrua</i>  | gadMor1                | UCSC gb                  | Ensembl<br>Gencode       | <a href="https://hgdownload.soe.ucsc.edu/goldenPath/gadMor1/bigZips/genes/gadMor1.ensGene.gtf.gz">https://hgdownload.soe.ucsc.edu/goldenPath/gadMor1/bigZips/genes/gadMor1.ensGene.gtf.gz</a>       |  |  |  |  |  |
| <i>S. salar</i>   | ICSASG_v2              | NCBI                     | Ncbi Refseq              | <a href="https://www.ncbi.nlm.nih.gov/genome/annotation_euk/Salmo_salar/100/">https://www.ncbi.nlm.nih.gov/genome/annotation_euk/Salmo_salar/100/</a>                                               |  |  |  |  |  |
| <i>C. milii</i>   | calMil1                | UCSC gb                  | Ncbi Refseq              | <a href="https://hgdownload.soe.ucsc.edu/goldenPath/calMil1/bigZips/genes/calMil1.ncbiRefSeq.gtf.gz">https://hgdownload.soe.ucsc.edu/goldenPath/calMil1/bigZips/genes/calMil1.ncbiRefSeq.gtf.gz</a> |  |  |  |  |  |

gb: genome browser
